# Supplementary material for: Correlation between paddy rice growth and satellite-observed methane column abundance does not imply causation
Source: Springer Nature journal article supplement (doi:10.1038/s41467-021-21434-7), 2021-02-19
Supplement: MOESM1 [file 41467_2021_21434_MOESM1_ESM.pdf]

## **Supplementary Information**

# **Correlation between paddy rice growth and satellite-observed methane column abundance does not imply causation**

Zhao-Cheng Zeng<sup>1,2\*</sup>, Brendan Byrne<sup>3\*</sup>, Fang-Ying Gong<sup>2</sup>, Zhonghua He<sup>4</sup>, and Liping Lei<sup>5</sup>

1 Joint Institute for Regional Earth System Science & Engineering, University of California, Los Angeles, Los Angeles, USA;

2 Division of Geological and Planetary Sciences, California Institute of Technology, Pasadena, USA;

3 Jet Propulsion Laboratory, California Institute of Technology, CA, USA;

4 Zhejiang Climate Center, Hanzhou, China;

5 Key Laboratory of Digital Earth Science, Institute of Remote Sensing and Digital Earth, Chinese Academy of Sciences, Beijing, China.

Corresponding to:

Z.-C. Zeng ([zcz@gps.caltech.edu](mailto:zcz@gps.caltech.edu)) and B. Byrne ([brendan.k.byrne@jpl.nasa.gov](mailto:brendan.k.byrne@jpl.nasa.gov))

**Supplementary Figure 1.**

**Supplementary Figure 2.**

**Supplementary Figure 3.**

**Supplementary Figure 4.**

**Supplementary Figure 5.**

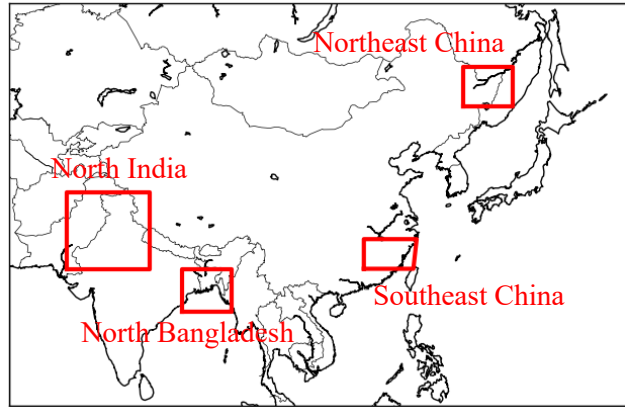

**Supplementary Figure 1.** The bounding boxes for the ROIs in model simulations. The Northeast China box is bounded by  $45^{\circ}$ - $59^{\circ}$  N and  $128.75^{\circ}$ - $136.25^{\circ}$  E; The North India is bounded by  $25^{\circ}$ - $35^{\circ}$  N,  $68.75^{\circ}$ - $81.25^{\circ}$  E; The North Bangladesh is bounded by  $19^{\circ}$ - $25^{\circ}$  N and  $86.25^{\circ}$ - $93.75^{\circ}$  E; and the Southeast China is bounded by  $25^{\circ}$ - $29^{\circ}$  N and  $113.75^{\circ}$ - $121.75^{\circ}$  E.

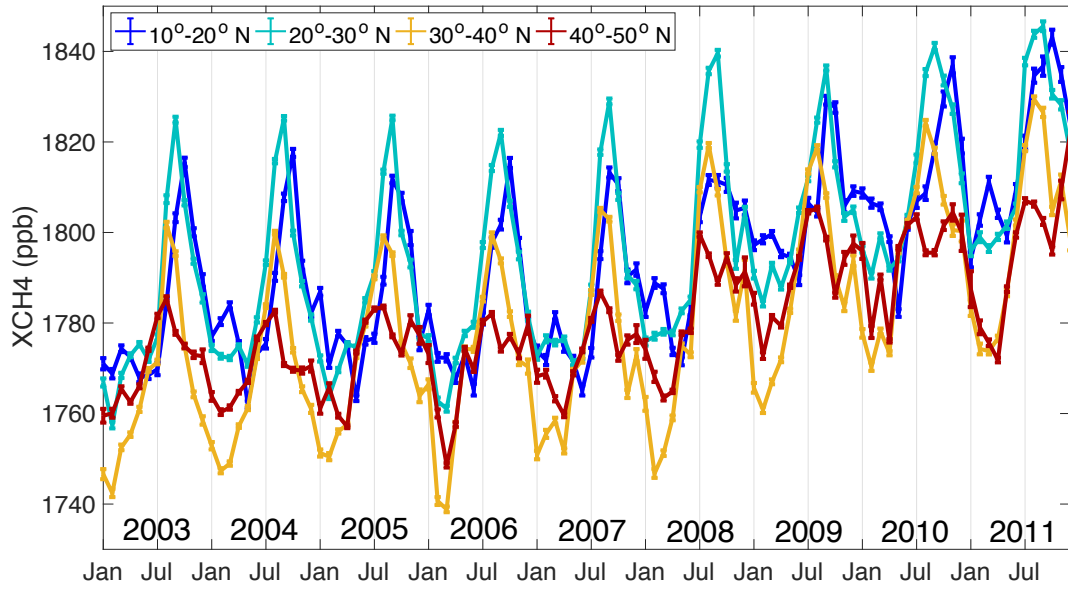

**Supplementary Figure 2.** The monthly mean XCH<sub>4</sub> from SCIAMACHY retrievals in Monsoon Asia for different latitude zones from 10° to 50° N. The error bars are the monthly uncertainties calculated by error propagation from the uncertainties in XCH<sub>4</sub> retrievals in a certain month.

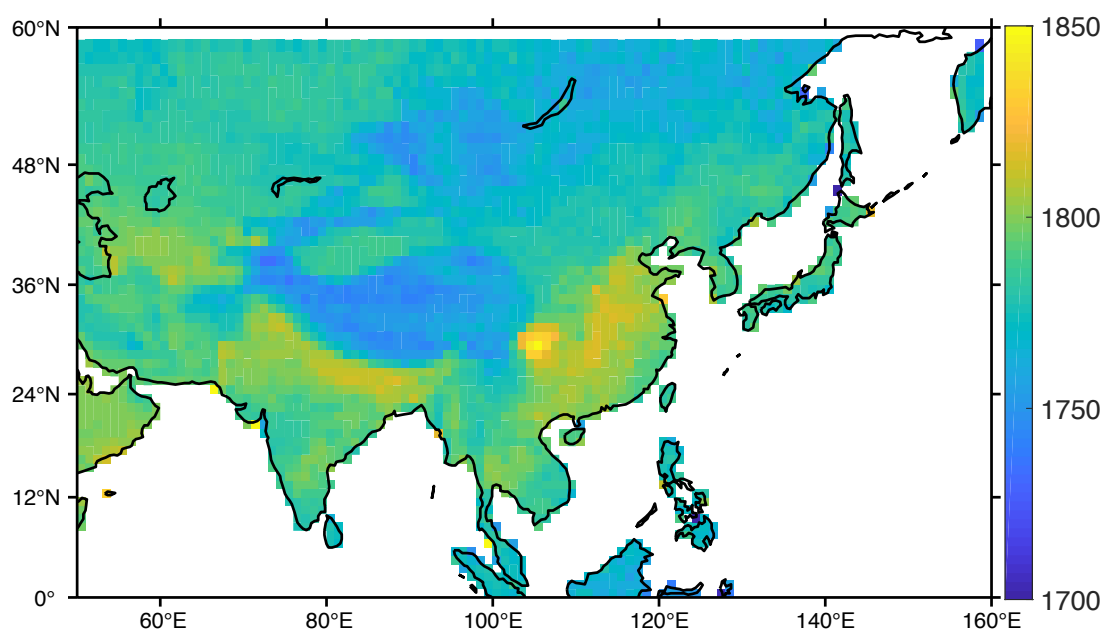

**Supplementary Figure 3.** Averaged  $\text{XCH}_4$  (in unit of ppb) from SCIAMACHY retrievals in Monsoon Asia in 2010. The original retrievals were averaged into  $1^\circ \times 1^\circ$  grids in latitude and longitude.

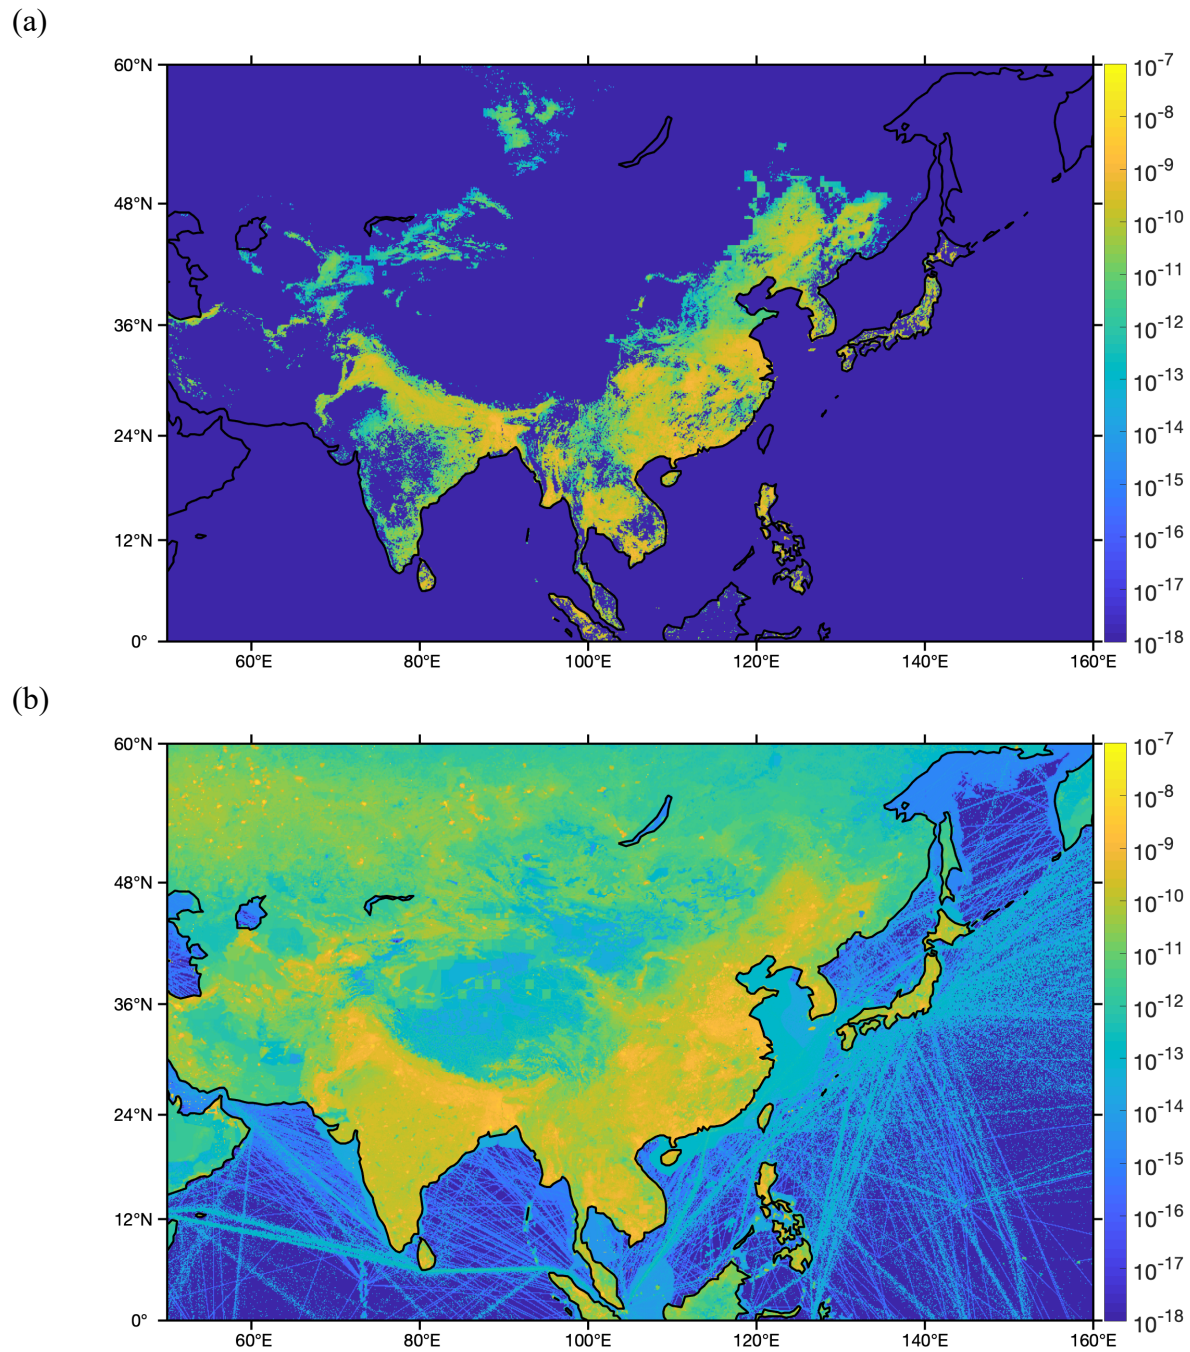

**Supplementary Figure 4.** CH<sub>4</sub> emissions (in unit of kg m<sup>-2</sup> s<sup>-1</sup>) from EDGAR bottom-up inventory for agriculture soil flux in (a) and total flux in (b) for the year of 2010.

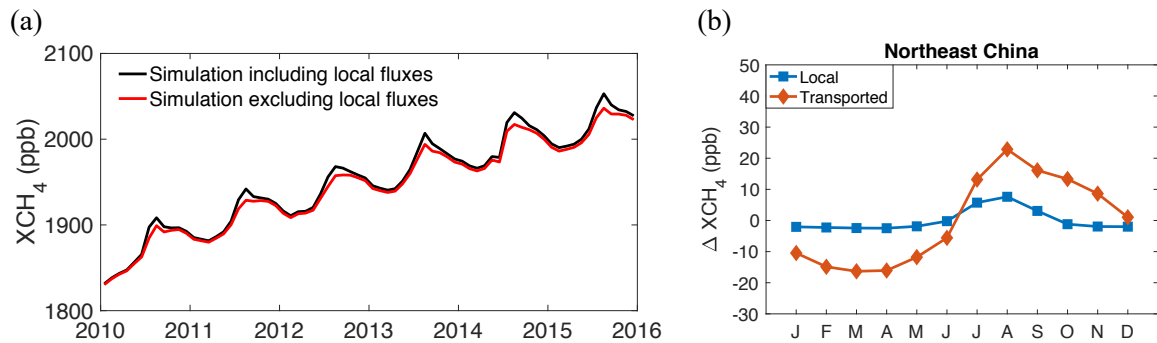

**Supplementary Figure 5.** GHGF-Flux simulated XCH<sub>4</sub> over Northeast China. (a) Monthly mean XCH<sub>4</sub> time series over six years for simulations including (black) and excluding (red) local fluxes; (b) The detrended six-year monthly mean time series of local (blue) and transported (red) contributions to the seasonal cycle of XCH<sub>4</sub>, where the transported contribution is obtained from the simulation excluding local fluxes and the local contribution is the difference between detrended simulations with and without local fluxes.
